# Supplementary material for: Generation and characterization of regulatory dendritic cells derived from murine induced pluripotent stem cells
Source: PubMed Central journal article supplement (PMC3913921; doi:10.1038/srep03979), 2014-02-05

Title:

Generation and characterization of regulatory dendritic cells derived from murine induced pluripotent stem cells

Authors:

Qi Zhang<sup>1, 2</sup>, Masayuki Fujino<sup>2, 3</sup>, Shizue Iwasaki<sup>2</sup>, Hiroshi Hirano<sup>2</sup>, Songjie Cai<sup>2</sup>, Yuya Kitajima<sup>2</sup>, Jinhua Xu<sup>1</sup>, Xiao-Kang Li<sup>1, 2</sup>

Affiliations:

<sup>1</sup>Department of Dermatology, Huashan hospital, Fudan University, Shanghai, China;

<sup>2</sup>Division of Transplantation Immunology, National Research Institute for Child Health and Development, Tokyo, Japan;

<sup>3</sup>AIDS Research Center, National Institute of Infectious Diseases, Tokyo, Japan.

\*Correspondence:

Xiao-Kang Li, M.D., Ph.D., Division of Transplantation Immunology, National Research Institute for Child Health and Development, 2-10-1 Okura, Setagaya-ku, Tokyo, 157-8535 Japan.

Tel: +81-3-3416-0181; Fax: +81-3-3417-2864; E-mail: [ri-k@ncchd.go.jp](mailto:ri-k@ncchd.go.jp)

&

Jinhua Xu, M.D., Ph.D., Department of Dermatology, Huashan Hospital, Fudan University, 12 Wulumuqi Middle Road, Shanghai, 200040 China.

Tel:+86-21-5288-9999; Fax:+86-21-6248-9191; E-mail: [xjhuashan@yahoo.com.cn](mailto:xjhuashan@yahoo.com.cn)

## Supplementary figure legends

Supplementary Figure 1: Un-cropped gel images of RT-PCR. The mRNA expression of the iPS cells in each step of differentiation into DCregs. The mRNA expressions of major molecules, including (A) Nanog, (B) OCT 3/4, (C) CD34, (D) Sca-1, (E) CD45, (F) CD11c, (G) CD11b, (H) I-A, (I) CD86, (J) CD80, (K) CD40 and (L) GAPDH, on the culture cells at different culture steps were examined.

(A)

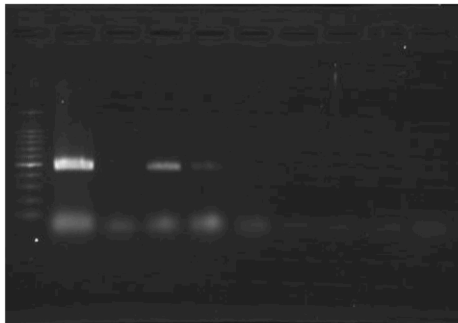

(E)

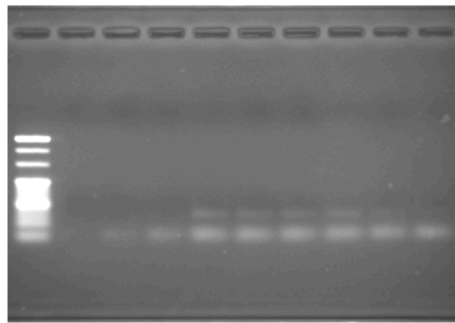

(I)

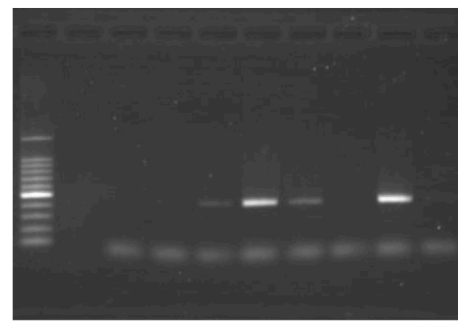

(B)

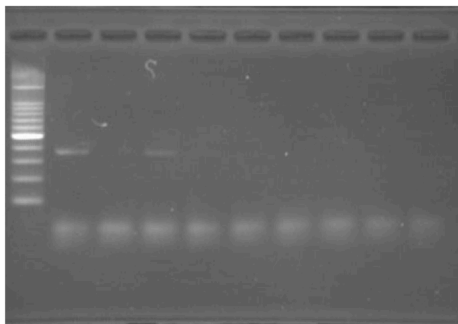

(F)

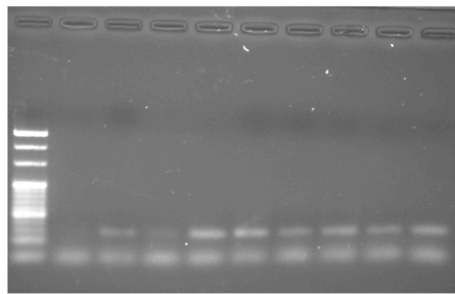

(J)

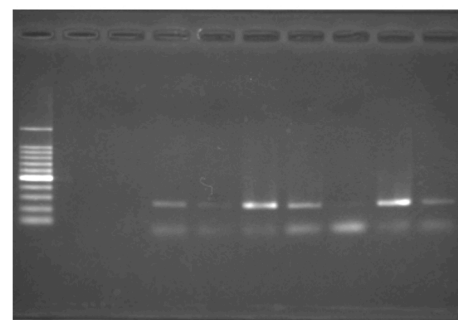

(C)

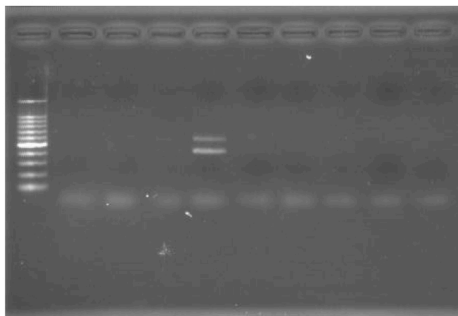

(G)

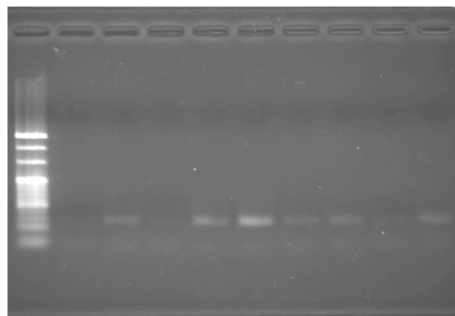

(K)

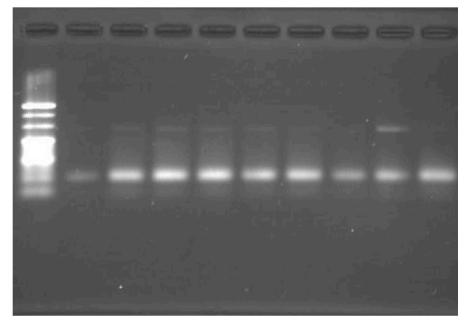

(D)

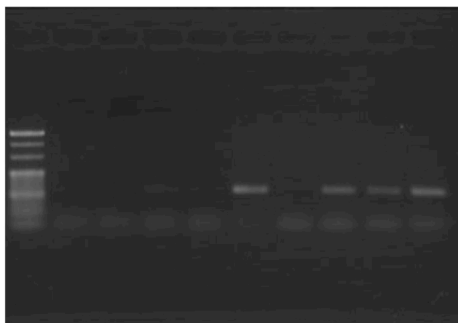

(H)

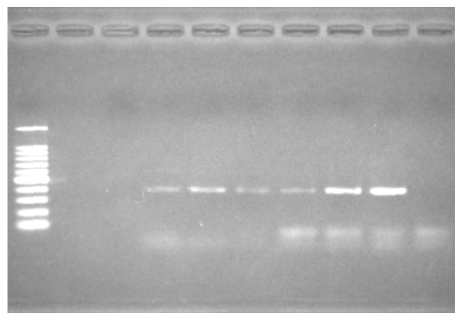

(L)

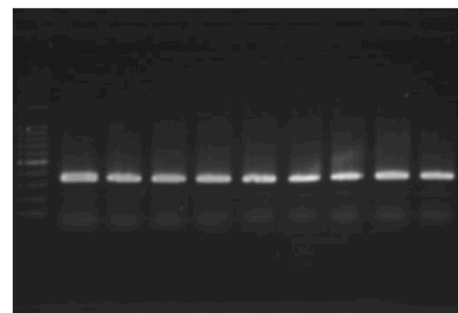

Supplement: srep03979-s1.pdf [file srep03979-s1.pdf]
